# Supplementary material
Source: MDPI journal article supplement (https://www.mdpi.com/2076-3417/12/1/310)
Supplement: s1 [file s1]

## Article

# Aroma Profiles of Dry-Hopped Ciders Produced with Citra, Galaxy, and Mosaic Hops

**Matthew T. Bingman**<sup>1</sup>, Josephine L. Hinkley<sup>2</sup>, Colin P. Bradley II<sup>3</sup> and Callie A. Cole<sup>4,\*</sup>

<sup>1</sup> Department of Chemistry & Biochemistry, University of Oregon, 1585 E 13th Ave, Eugene, OR 97403, USA; mbingman@uoregon.edu

<sup>2</sup> **Rocky Vista College of Osteopathic Medicine**, 255 E Center St, Ivins, UT 84738, USA; josephine.hinkley@ut.rvu.edu

<sup>3</sup> Department of Chemistry, Columbia Basin College, 2600 N 20th Ave, Pasco, WA 99301, USA; cbradley@columbiabasin.edu

<sup>4</sup> Department of Chemistry & Biochemistry, Fort Lewis College, 1000 Rim Drive, Durango, CO 81301, USA

\* Correspondence: ccole@fortlewis.edu

**Citation:** Bingman, M.T.; Hinkley, J.L.; Bradley, C.P.II; Cole, C.A. Aroma Profiles of Dry-Hopped Ciders Produced with Citra, Galaxy, and Mosaic Hops. *Appl. Sci.* **2022**, *12*, 310. <https://doi.org/10.3390/app12010310>

Academic Editor: Agata Górka

Received: 24 December 2021

Accepted: 20 December 2021

Published: 29 December 2021

**Publisher's Note:** MDPI stays neutral with regard to jurisdictional claims in published maps and institutional affiliations.

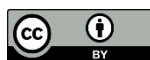

**Copyright:** © 2021 by the authors. Submitted for possible open access publication under the terms and conditions of the Creative Commons Attribution (CC BY) license (<https://creativecommons.org/licenses/by/4.0/>).

**Table S1.** Semi-quantification of volatile compounds (mg/L) in juice, cider, and dry-hopped cider prepared from Gravenstein apples picked in Southwest Colorado. All analytes are listed in order of chromatographic retention time (shown in parentheses). Quantified values were determined using 3 internal standards: 4-methyl-2-pentanol (for alcohols), ethyl heptanoate (for esters, aldehydes, ketones, and volatile acids), and d6-myrcene (for terpenes).

Blue font indicates detection near/above perception

threshold

Green font indicates unknown perception threshold

Red font indicates below perception threshold

|                                     | Ocimene<br>(14.6 min) | Linalool<br>(17.3 min) | Geraniol<br>(24.6 min) | Cyclotene<br>(25.6 min) | Carophyllene<br>(31.7 min) | Humulene<br>(33.1 min) | Farnesene<br>(33.3 min) |
|-------------------------------------|-----------------------|------------------------|------------------------|-------------------------|----------------------------|------------------------|-------------------------|
| Juice<br>(Day 0 pre-innoculation)   | ND                    | ND                     | ND                     | ND                      | ND                         | ND                     | ND                      |
| Fermentation Day 2                  | ND                    | ND                     | ND                     | ND                      | ND                         | ND                     | ND                      |
| Fermentation Day 4                  | ND                    | ND                     | ND                     | ND                      | ND                         | ND                     | ND                      |
| Fermentation Day 6                  | ND                    | ND                     | ND                     | ND                      | ND                         | ND                     | ND                      |
| Fermentation Day 8                  | ND                    | ND                     | ND                     | ND                      | ND                         | ND                     | ND                      |
| Fermentation Day 10                 | ND                    | ND                     | ND                     | ND                      | ND                         | ND                     | ND                      |
| Fermentation Day 12                 | ND                    | ND                     | ND                     | ND                      | ND                         | ND                     | ND                      |
| Fermentation Day 14                 | ND                    | ND                     | ND                     | ND                      | ND                         | ND                     | ND                      |
| Fermentation Day 16                 | ND                    | ND                     | ND                     | ND                      | ND                         | ND                     | ND                      |
| Fermentation Day 18                 | ND                    | ND                     | ND                     | ND                      | ND                         | ND                     | ND                      |
| Fermentation Day 20                 | ND                    | ND                     | ND                     | ND                      | ND                         | ND                     | ND                      |
| Fermentation Day 22                 | ND                    | ND                     | ND                     | ND                      | ND                         | ND                     | ND                      |
| Fermentation Day 28                 | ND                    | ND                     | ND                     | ND                      | ND                         | ND                     | ND                      |
| Fermentation Day 40                 | ND                    | ND                     | ND                     | ND                      | ND                         | ND                     | ND                      |
| Fermentation Day 47                 | ND                    | ND                     | ND                     | ND                      | ND                         | ND                     | ND                      |
| <b>Finished Cider<br/>(Day 135)</b> | ND                    | ND                     | ND                     | ND                      | ND                         | ND                     | ND                      |

**Dry Hopped  
Ciders  
(Days 139  
and 142):**

|                     |      |                  |                  |                  |               |                  |      |
|---------------------|------|------------------|------------------|------------------|---------------|------------------|------|
| Hop Day 5<br>Citra  | <LOQ | 0.007 ±<br>0.003 | 0.002 ±<br>0.001 | ND               | 0.002 ± 0.001 | 0.004 ±<br>0.001 | ND   |
| Hop Day 5<br>Galaxy | <LOQ | ND               | ND               | ND               | 0.005 ± 0.002 | <LOQ             | <LOQ |
| Hop Day 5<br>Mosaic | <LOQ | 0.003 ±<br>0.001 | 0.002 ±<br>0.001 | ND               | 0.003 ± 0.001 | 0.010 ±<br>0.004 | ND   |
| Hop Day 8<br>Citra  | <LOQ | ND               | ND               | ND               | ND            | 0.005 ±<br>0.002 | ND   |
| Hop Day 8<br>Galaxy | ND   | ND               | ND               | 0.003 ±<br>0.001 | <LOQ          | <LOQ             | ND   |

**Odors and  
Perception  
Thresholds:**

*He 2021 (Food  
Chem) Odor:*

*Aparicio 1998  
(J Agric Food  
Chem) Odor:*

*Aparicio 1998  
(J Agric Food  
Chem)  
Perception  
Threshold:*

*Bingman 2020  
(Beverages)  
Odor:*

*Bingman 2020  
(Beverages)  
Perception  
Threshold:*

*Niu 2018  
(Food Research  
Intl) Odor:*

*Niu 2018  
(Food Research  
Intl) Perception  
Threshold:*

*Plotto 2004  
(Flavour and  
Fragrance)  
Perception  
Threshold:*

|                                                                                                              |                                                     |                                           |                       |                       |  |
|--------------------------------------------------------------------------------------------------------------|-----------------------------------------------------|-------------------------------------------|-----------------------|-----------------------|--|
| <i>Aros 2020</i><br>( <i>Agronomy</i> )<br>Odor:                                                             | <b>warm<br/>herbaceous,<br/>green,terpen<br/>ic</b> | <b>balsamic,<br/>hop, wood,<br/>spice</b> |                       |                       |  |
| <i>Eyres 2009</i><br>( <i>Hop Essential</i><br><i>Oil</i> ) Odor:                                            |                                                     | <b>balsamic</b>                           |                       |                       |  |
| <i>Schreiner 2020</i><br>( <i>J Nat Prod</i> )<br>Perception<br>Threshold:                                   |                                                     |                                           |                       |                       |  |
| <a href="#"><u>Schreiner 2020</u></a><br><a href="#"><u>(J Nat Prod)</u></a><br><a href="#"><u>Odor:</u></a> |                                                     |                                           |                       |                       |  |
| <i>Miyazawa 2012</i><br>( <i>J Essential Oil</i><br><i>Research</i> )<br>Perception<br>Threshold:            | <b>0.034 mg/L</b>                                   | <b>0.064 mg/L</b>                         | <b>0.160<br/>mg/L</b> | <b>0.034<br/>mg/L</b> |  |
| <i>Escudero 2004</i><br>( <i>J Ag Food</i><br><i>Chem</i> ):                                                 |                                                     |                                           |                       |                       |  |
| <i>Yu 2020 (Food</i><br><i>Res Intl)</i> :                                                                   |                                                     |                                           |                       |                       |  |
| <a href="#"><u>Galvao 2011</u></a><br><a href="#"><u>(Food Re Intl)</u></a> :                                |                                                     |                                           |                       |                       |  |
| <i>Moreno 2005</i><br>( <i>Food Control</i> ):                                                               |                                                     |                                           |                       |                       |  |

**Table S2.** Semi-quantified VOCs a (mg L<sup>-1</sup>) added to cider headspace as a result of dry hopping for 5 and 8 days with Citra, Galaxy, and Mosaic hops. Species in bold were quantified above the perception.

|                                  |          | Citra         |               | Galaxy        |               | Mosaic        |               | Odor Descriptor                            | PT (mg L <sup>-1</sup> ) |
|----------------------------------|----------|---------------|---------------|---------------|---------------|---------------|---------------|--------------------------------------------|--------------------------|
|                                  |          | Day 5         | Day 8         | Day 5         | Day 8         | Day 5         | Day 8         |                                            |                          |
| Terpenes                         | RT (min) | Concentration | Concentration | Concentration | Concentration | Concentration | Concentration |                                            |                          |
| β-myrcene                        | 11.9     | 0.104 ± 0.041 | 0.278 ± 0.108 | 0.038 ± 0.015 | 0.044 ± 0.017 | 0.061 ± 0.024 | 0.070 ± 0.027 | Citrus <sup>b</sup> , Spicy <sup>c</sup>   | 0.036 <sup>f</sup>       |
| D-limonene                       | 13.5     | 0.002 ± 0.001 | 0.005 ± 0.002 | -             | -             | <LOQ          | <LOQ          | Lemon, orange <sup>c,d</sup>               | 0.2 <sup>f</sup>         |
| Linalool                         | 17.3     | 0.007 ± 0.003 | -             | -             | -             | 0.003 ± 0.001 | 0.008 ± 0.003 | Citrus, floral <sup>b,c</sup>              | 0.001 <sup>d</sup>       |
| Geraniol                         | 24.6     | 0.002 ± 0.001 | -             | -             | -             | 0.002 ± 0.001 | 0.003 ± 0.001 | Floral <sup>b</sup> , Rose <sup>c</sup>    | 0.01 <sup>g</sup>        |
| Cyclotene                        | 25.6     | -             | -             | -             | 0.003 ± 0.001 | -             | 0.002 ± 0.001 | Curry, licorice <sup>h</sup>               | -                        |
| β-Caryophyllene                  | 31.7     | 0.002 ± 0.001 | -             | 0.005 ± 0.002 | <LOQ          | 0.003 ± 0.001 | <LOQ          | Woody <sup>c</sup> , Balsamic <sup>d</sup> | 0.069 <sup>i</sup>       |
| Humulene                         | 33.1     | 0.004 ± 0.001 | 0.005 ± 0.002 | <LOQ          | <LOQ          | 0.010 ± 0.004 | 0.004 ± 0.001 | Woody <sup>c</sup> , Balsamic <sup>c</sup> | 0.16 <sup>i</sup>        |
| <b>Esters</b>                    |          |               |               |               |               |               |               |                                            |                          |
| Ethyl propanoate                 | 2.7      | -             | <LOQ          | -             | <LOQ          | -             | 0.041 ± 0.061 | Banana <sup>j</sup>                        | 0.550 <sup>k</sup>       |
| 3-methylbutyl 2-methylpropanoate | 13.1     | 0.033 ± 0.013 | 0.026 ± 0.10  | 0.188 ± 0.073 | 0.164 ± 0.064 | 0.023 ± 0.009 | 3.100 ± 1.209 | Fruity, floral <sup>l</sup>                | -                        |
| Methyl heptanoate                | 13.5     | -             | -             | 0.006 ± 0.002 | -             | -             | -             | Fruity <sup>m</sup>                        | 0.004 <sup>m</sup>       |
| Ethyl tridecanoate               | 25.58    | -             | -             | -             | 0.005 ± 0.002 | -             | -             | Fresh, floral <sup>n</sup>                 | -                        |
| Ethyl undecanoate                | 26.5     | -             | -             | -             | 0.003 ± 0.001 | -             | -             | Fresh, floral <sup>n</sup>                 | -                        |
| Ethyl nonanoate                  | 26.5     | -             | 0.002 ± 0.001 | -             | -             | 0.015 ± 0.003 | -             | Fruit <sup>o</sup>                         | 3.151 <sup>o</sup>       |
| Methyl geranate                  | 27.7     | -             | 0.059 ± 0.023 | -             | 0.038 ± 0.015 | -             | 6.310 ± 2.461 | Sweet, candy <sup>p</sup>                  | -                        |
| <b>Ketones</b>                   |          |               |               |               |               |               |               |                                            |                          |
| Acetophenone                     | 15.3     | <LOQ          | -             | -             | -             | -             | 0.039 ± 0.015 | Floral <sup>q</sup>                        | 0.065 <sup>q</sup>       |
| 2-nonanone                       | 16.8     | 0.003 ± 0.001 | -             | -             | -             | -             | 1.160 ± 0.452 | Floral <sup>q</sup>                        | 0.082 <sup>q</sup>       |
| 2-decanone                       | 22.1     | -             | -             | 1.740 ± 0.679 | 1.240 ± 0.484 | 1.240 ± 0.484 | 1.160 ± 0.452 | Citrus <sup>r</sup>                        | -                        |
| 2-tridecanone                    | 24.6     | -             | -             | -             | 0.004 ± 0.002 | -             | 0.187 ± 0.073 | Herbal <sup>r</sup>                        | -                        |
| 2-dodecanone                     | 24.7     | 0.003 ± 0.001 | 0.015 ± 0.006 | -             | -             | 0.035 ± 0.010 | 0.495 ± 0.193 | Fruity, orange <sup>r</sup>                | -                        |
| 2-undecanone                     | 26.4     | -             | -             | 0.025 ± 0.010 | 0.018 ± 0.015 | 0.209 ± 0.082 | 4.720 ± 1.841 | Fruity, citrus <sup>r</sup>                | -                        |
| <b>Higher Alcohols</b>           |          |               |               |               |               |               |               |                                            |                          |
| 3-ethyl-4-methylpentanol         | 15.8     | -             | -             | -             | -             | -             | 0.039 ± 0.015 | Floral <sup>s</sup>                        | -                        |
| <b>Volatile Acids</b>            |          |               |               |               |               |               |               |                                            |                          |
| Propanoic acid                   | 10.9     | 0.004 ± 0.002 | -             | -             | 0.008 ± 0.003 | -             | -             | Spicy, soy <sup>t</sup>                    | 0.003 <sup>t</sup>       |

a This table is limited to analytes with published odor descriptors and/or perception thresholds. For a complete list of detected analytes, please refer to Supplementary Table S1. b(Wijaya et al., 2002), c(Miyazawa et al., 2012), d(Aros et al., 2020), e(Steinhaus, Wilhelm, & Schieberle, 2007), f(Plotto, Margaria, Goodner, Goodrich, & Baldwin, 2004), g(Cheong et al., 2011), h(Cullere, de Simon, Cadahia, Ferreira, Hernandez-Orte, & Cacho, 2013), i(Miyazawa et al., 2012), j(Niu, Yao, Xiao, Zhu, & Chen, 2018), k(Yu et al., 2020), l(Fang & Qian, 2005), m(Pino et al., 2021), n(Shu, Zhang, Wang, Ren, & Wang, 2014), o(Xia, Liu, Wang, & Shuang, 2020), p(Wang & Kays, 2000), q(Yu, Xie, Xie, Chen, Ai, & Tian, 2021), r(Van Opstaele et al., 2012), s(Shimoda, Nishihara, Ozawa, Takabayashi, & Arimura, 2012), t(Tian, Xu, Chen, & Yu, 2019).
